# Supplementary material for: Supercapacitor electrodes with especially high rate capability and cyclability based on a novel Pt nanosphere and cysteine-generated graphene
Source: Royal Society of Chemistry journal article supplement (doi:10.1039/c2cp41051f), 2012-01-01
Supplement: c2cp41051f.pdf [file c2cp41051f.pdf]

## Supporting information for

### Supercapacitor electrodes with especially high rate capability and cyclability based on a novel Pt nanosphere and cysteine-generated graphene

Dacheng Zhang,<sup>a</sup> Xiong Zhang,<sup>a</sup> Yao Chen,<sup>a</sup> Changhui Wang,<sup>a</sup> Yanwei Ma,<sup>\*a</sup> Huanli Dong,<sup>b</sup> Lang Jiang,<sup>b</sup> Qing Meng<sup>b</sup> and Wenping Hu<sup>\*b</sup>

**Fig. S1** Nitrogen adsorption and desorption isotherms of CG and corresponding pore-size distribution (inset) calculated by BJH method from desorption.

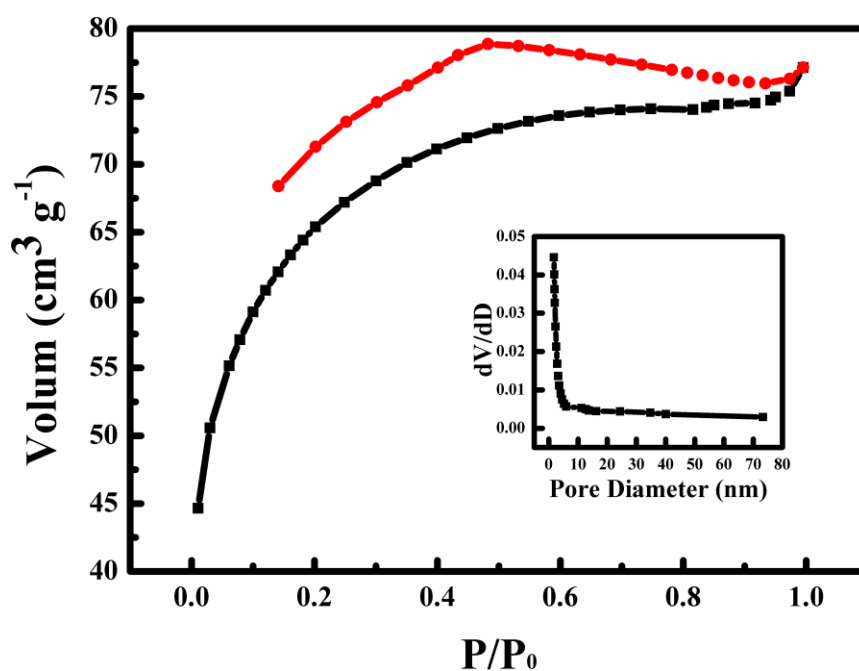

**Tab. S1** Electrochemical performance comparisons of graphene-based supercapacitors

| Ref.            | Maximum capacitance                            | Capacitance at high current load                | Cycle life          |
|-----------------|------------------------------------------------|-------------------------------------------------|---------------------|
| CG <sup>a</sup> | 249 F g <sup>-1</sup> (0.1 A g <sup>-1</sup> ) | 150 F g <sup>-1</sup> (50 A g <sup>-1</sup> )   | 120% (40000 cycles) |
| 1               | 276 F g <sup>-1</sup> (0.1 A g <sup>-1</sup> ) | 205 F g <sup>-1</sup> (5 A g <sup>-1</sup> )    | 106% (2000 cycles)  |
| 1               | 238 F g <sup>-1</sup> (0.1 A g <sup>-1</sup> ) | 143 F g <sup>-1</sup> (5A g <sup>-1</sup> )     | -                   |
| 2               | 238 F g <sup>-1</sup> (0.1 A g <sup>-1</sup> ) | 140 F g <sup>-1</sup> (5 A g <sup>-1</sup> )    | 97% (1000 cycles)   |
| 3               | 175 F g <sup>-1</sup> (10 mV s <sup>-1</sup> ) | 152 F g <sup>-1</sup> (20 mV s <sup>-1</sup> )  | -                   |
| 4               | 147 F g <sup>-1</sup> (2 mV s <sup>-1</sup> )  | -                                               | 110% (1500 cycles)  |
| 5               | 165 F g <sup>-1</sup> (20 mV s <sup>-1</sup> ) | 125 F g <sup>-1</sup> (5 A g <sup>-1</sup> )    | 108% (8000 cycles)  |
| 6               | 262 F g <sup>-1</sup> (1 mV s <sup>-1</sup> )  | 169 F g <sup>-1</sup> (800 mV s <sup>-1</sup> ) | 97% (100 cycles)    |

<sup>a</sup> Samples in the present work

## Notes and references

<sup>a</sup> Institute of Electrical Engineering, Chinese Academy of Sciences

, Beijing, 100190, China. Fax: 86-82547137; Tel: 86-82547129; E-mail: ywma@mail.iee.ac.cn

<sup>b</sup> Institute of Chemistry, Chinese Academy of Sciences, Beijing, 100190, China. Tel: 86-82615030; E-mail: huwp@iccas.ac.cn

- 1 Z. Lin, Y. Liu, Y. Yao, O. J. Hildreth, Z. Li, K. Moon and C. Wong, *J. Phys. Chem. C*, 2011, **115**, 7120.
- 2 D. Zhang, X. Zhang, Y. Chen, C. Wang and Y. Ma, *Electrochim. Acta* 2012, doi:10.1016/j.electacta.2012.03.024.
- 3 Y. X. Xu, K. X. Sheng, C. Li and G. Q. Shi, *Acs Nano* 2010, **4**, 4324.
- 4 D. W. Wang, F. Li, J. Zhao, W. Ren, Z. G. Chen, J. Tan, Z. S. Wu, I. Gentle, G. Q. Lu and H. M. Cheng, *Acs Nano* 2009, **3**, 1745.
- 5 Y. Y. Shao, J. Wang, M. Engelhard, C. M. Wang, Y. H. Lin, *J. Mater. Chem.* 2010, **20**, 743.
- 6 W. Lv, D.M. Tang, Y.B. He, C.H. You, Z.Q. Shi, X.C. Chen, C.M. Chen, P. X. Hou, C. Liu and Q. H. Yang, *Acs Nano* 2009, **3**, 3730.
